# Supplementary material for: How to maximize the aspect ratio of clay nanoplatelets
Source: Royal Society of Chemistry journal article supplement (doi:10.1039/c2nr31322g), 2012-01-01
Supplement: c2nr31322g.pdf [file c2nr31322g.pdf]

## How to Maximize the Aspect Ratio of Clay Nanoplatelets

Hussein Kalo,<sup>a</sup> Michael W. Möller,<sup>a</sup> Daniel A. Kunz,<sup>a</sup> and Josef Breu<sup>\*a</sup>

<sup>a</sup>Lehrstuhl für Anorganische Chemie I, Universität Bayreuth, 95440 Bayreuth, Germany.

Fax: (+49) 921-552788; Telephone: (+49) 921-552531; E-mail: [josef.breu@uni-bayreuth.de](mailto:josef.breu@uni-bayreuth.de)

### Supplementary Information:

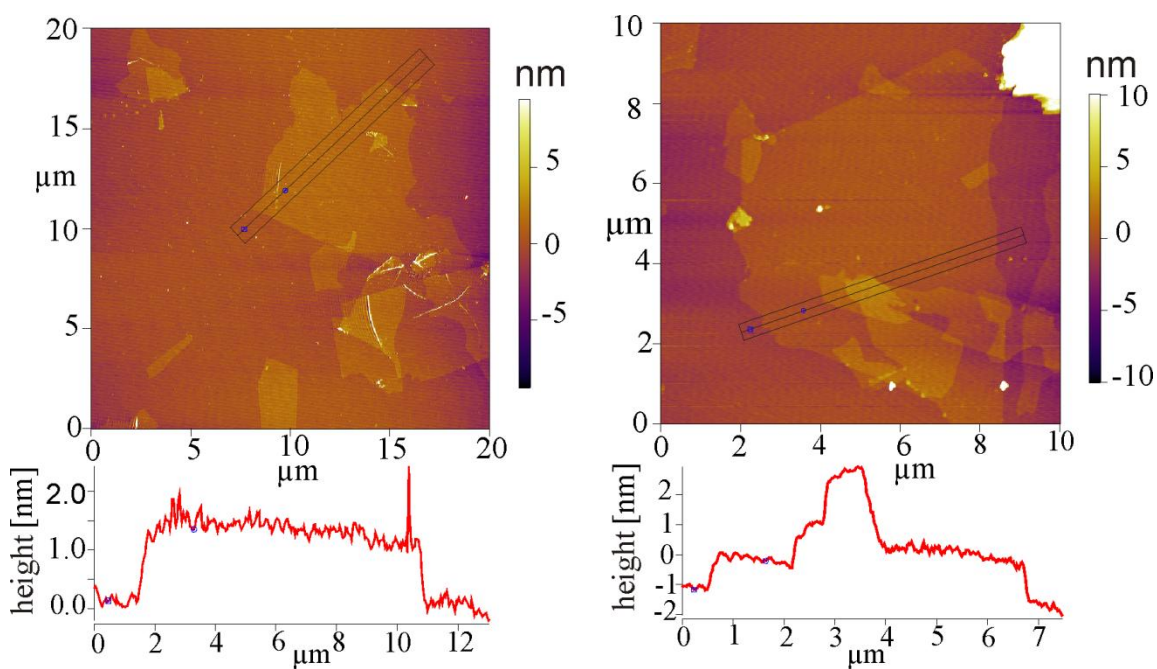

**Fig. S1** AFM image of different samples of synthetic Li-hect<sub>1.0</sub>.
